1 **The role of inflammation in the prospective associations between early childhood**  
2 **sleep problems and ADHD at 10 years: Findings from a UK birth cohort study**

3 **Short title:** Sleep, inflammation, and ADHD in children

4 Isabel Morales Muñoz, Rachel Upthegrove, Kate Lawrence, Sandra Kooij, Alice M Gregory, Steven  
5 Marwaha

6 **Institute for Mental Health, University of Birmingham, Edgbaston, Birmingham, United**  
7 **Kingdom** (I Morales-Muñoz PhD, R Upthegrove MD, PhD, S Marwaha PhD); **Early Intervention**  
8 **Service, Birmingham Women’s and Children’s NHS Trust, Birmingham, United Kingdom** (R  
9 Upthegrove MD, PhD); **Department of Psychology, St Mary’s University Twickenham London,**  
10 **London, United Kingdom** (K Lawrence PhD); **Department of Psychiatry, Amsterdam University**  
11 **Medical Center / VU University Medical Center, Amsterdam, The Netherlands** (S Kooij, MD,  
12 PhD); **PsyQ, Expertise Center Adult ADHD, The Hague, The Netherlands** (S Kooij, MD, PhD);  
13 **Department of Psychology, Goldsmiths, University of London, London, United Kingdom** (A  
14 Gregory PhD); **Specialist Mood Disorders Clinic, Zinnia Centre, Birmingham, United Kingdom**  
15 **(S Marwaha PhD); The Barberry National Centre for Mental Health, Birmingham, United**  
16 **Kingdom** (S Marwaha PhD)

17 Correspondence to: Isabel Morales-Muñoz, PhD, Institute for Mental Health, School of  
18 Psychology, University of Birmingham, 52 Pritchatts Road, B15 2SA, Birmingham, United  
19 Kingdom

20 **I.Morales-Munoz@bham.ac.uk**

21

22

23

## 24 **Abstract**

25 **Background:** Several underlying mechanisms potentially account for the link between sleep and  
26 attention deficit and hyperactivity disorder (ADHD), including inflammation. However, studies so  
27 far have been cross-sectional. We investigate (i) the association between early childhood sleep and  
28 probable ADHD diagnosis in childhood; and (ii) whether childhood circulating inflammatory markers  
29 mediate any associations.

30 **Methods and Findings:** Data from the Avon Longitudinal Study of Parents and Children (ALSPAC)  
31 were available for 7658 10-years-old children. Parent-reported sleep duration, night awakening  
32 frequency, and regular sleep routines were collected at 3.5 years. The Development and Wellbeing  
33 Assessment (DAWBA) was administered to capture children with clinically relevant ADHD  
34 symptoms, or probable ADHD diagnosis. Further, blood samples were collected at 9 years, from  
35 which two inflammatory markers were obtained [i.e. interleukin-6 (IL-6) and C-reactive protein  
36 (CRP)]. Logistic regressions were applied to investigate the associations between sleep variables at  
37 3.5 years and probable ADHD diagnosis at 10 years. Further, path analysis was applied to examine  
38 the mediating role of inflammation at 9 years (i.e. as measured by CRP and IL-6) in the associations  
39 between early sleep and ADHD at 10 years. We found that less regular sleep routines (OR=0.51,  
40 95%CI=0.28-0.93, p=0.029), shorter nighttime sleep (OR=0.70, 95%CI=0.56-0.89, p=0.004), and  
41 higher night awakening (OR=1.27, 95%CI=1.06-1.52, p=0.009) at 3.5 years were associated with  
42 higher odds of probable ADHD at 10 years. Further, IL-6 at 9 years mediated the association between  
43 irregular sleep routines and ADHD (bias-corrected estimate, -0.002; p=0.005); and between night  
44 awakening and ADHD (bias-corrected estimate, 0.002; p=0.003).

45 **Conclusions:** Several sleep problems in early childhood constitute a risk factor for probable ADHD  
46 diagnosis at 10 years. These associations may be mediated by inflammation, as measured by IL-6.  
47 These results open a new research vista to the pathophysiology of ADHD and highlight sleep and  
48 inflammation as potential preventative targets for ADHD.

## 49 **Introduction**

50 A good night of sleep is considered to be essential for every aspect of a child's functioning (1).  
51 Further, identification of sleep problems in children is important because they are associated with  
52 physical, cognitive, and socio-emotional problems (2). For instance, sleep problems are commonly  
53 comorbid with neurodevelopmental conditions, including Attention Deficit and Hyperactivity  
54 Disorder (ADHD) (3). Systematic reviews indicate that the prevalence of ADHD in children and  
55 young people is between 2% and 7%, with an average of around 5% (4), and is characterized by  
56 attention difficulties, impulsivity and/or hyperactivity that interfere with social functioning and/or  
57 development (5). The aetiology of ADHD is multifactorial and includes both genetic and  
58 environmental factors (6,7). One manifestation of this aetiology is disturbed sleep and there has been  
59 a dramatic increase in new research to better understand the association between disturbed sleep and  
60 ADHD (8).

61 Sleep disturbances are commonly comorbid with ADHD, and between 70% and 85% of  
62 children with ADHD experience problems with sleep (9). Sleep problems, such as fragmented sleep,  
63 bedtime resistance, and/or sleep-onset insomnia in early childhood have been found to precede  
64 ADHD symptoms. For instance, sleep disturbances at age 4 are associated with attention problems at  
65 age 15 (10). Other studies have revealed similar associations at earlier stages, with sleep problems  
66 between the ages of 2–4 years being associated with attention deficits at age 5 (11) or short sleep  
67 duration from 3-24 months associating with inattention at 5 years (12). These studies suggest that  
68 sleep problems in early childhood may be an initial symptom, risk indicator of later ADHD or a causal  
69 factor in the development of ADHD symptoms. However, most of these longitudinal studies have  
70 focused on ADHD symptomatology, rather than ADHD diagnosis. Further, it is still unclear whether  
71 all or only some specific sleep problems in early childhood precede the development of ADHD,  
72 although previous reviews and meta-analyses suggest that different sleep variables are associated  
73 with ADHD symptoms (13,14). Further, sleep problems in individuals with ADHD can result in

74 significant functional impairments that affect mood, attention, behavior, and ultimately quality of  
75 life,(15) which supports the necessity of further investigating sleep problems in ADHD.

76 If sleep and ADHD are robustly and prospectively associated, the next step would be to  
77 understand the potential mechanisms by which sleep difficulties may increase the risk for ADHD.  
78 This could help us better understand the aetiology of poorer outcomes in people with ADHD and  
79 consequently design more targeted interventions. Among these potential candidates, inflammation  
80 has recently received some attention, and preliminary evidence suggests that inflammatory processes  
81 could contribute to the association between sleep and ADHD (16), although this requires further  
82 research consideration.

83 Sleep disturbances have been associated with altered levels of inflammatory cytokines in  
84 adults (17), but data in youth is still lacking. Two of the inflammatory markers that have received  
85 greatest attention in relation to sleep are interleukin-6 (IL-6) and C-reactive protein (CRP) (17). IL-6  
86 is a pro-inflammatory cytokine produced in response to environmental stressors, infections and  
87 injuries. Dysregulated and persistent IL-6 production in certain cell populations leads to the  
88 development of various diseases (18). CRP is a pentameric protein synthesized by the liver, and its  
89 level rises in response to inflammation (19). A recent study reported that morning serum IL-6  
90 associates with actigraphy-based night sleep efficiency and minutes spent awake in children and  
91 adolescents (20). Further, a recent study reported higher CRP and IL6 levels in children with ADHD,  
92 compared to healthy children (21,22). Overall, there is recent evidence to support the potential  
93 contributing role of inflammation in the association between sleep and ADHD in children. Currently,  
94 as far as we are aware there is no research which has specifically investigated the prospective  
95 association between inflammation, sleep and ADHD. Increased understanding here would allow us  
96 to further interrogate potential mechanisms underlying the links between disturbed sleep and ADHD  
97 and potentially better targeted early interventions in ADHD.

98           Therefore, the aims of this study were to investigate (i) the association between sleep variables  
99 (i.e., regular sleep routines, daytime sleep duration, nighttime sleep duration and night awakenings)  
100 in early childhood and probable ADHD diagnosis in childhood; and (ii) whether circulating markers  
101 of inflammation (i.e., CRP and IL-6) in childhood mediate the associations between sleep variables  
102 and later probable ADHD diagnosis. We hypothesized that shorter nighttime sleep duration would be  
103 the key sleep variable to be associated with later ADHD,(12) and that CRP and IL-6 would mediate  
104 the prospective association between sleep and ADHD.

## 105 **Methods and Materials**

### 106 **Participants**

107 The Avon Longitudinal Study of Parents and Children (ALSPAC) is a UK birth cohort study  
108 examining the determinants of development, health and disease during childhood and beyond (23,24).  
109 Pregnant women resident in Avon, UK with expected dates of delivery 1st April 1991 to 31st  
110 December 1992 were invited to take part in the study. The ALSPAC study website contains details  
111 of all the data available through a fully searchable data dictionary and variable search tool  
112 (<http://www.bristol.ac.uk/alspac/researchers/our-data/>). Further details of the ALSPAC cohort are  
113 provided in Supplementary material. Informed consent for the use of data collected via questionnaires  
114 and clinics was obtained from participants following the recommendations of the ALSPAC Ethics  
115 and Law Committee at the time. Ethical approval was obtained from the ALSPAC Law and Ethics  
116 committee and the local research ethics committees.

### 117 **Measures**

#### 118 *Sleep assessment at 3.5 years old*

119 Parent-reported sleep routines regularity, daytime sleep duration, nighttime sleep duration, and night  
120 awakenings frequency were assessed when the child was 3.5 years old. This time-point was focused  
121 upon based on previous findings that this time-point showed the strongest prospective associations

122 with mental health problems in adolescence (25). Further, by the age of 3, children's sleep-wake  
123 patterns are consolidated (26), which allows us to better differentiate sleep difficulties from normative  
124 developmental patterns. These sleep variables were collected using questionnaires, and the mothers  
125 were asked about their child's bed and wake up times, night awakenings frequency, daytime sleep  
126 duration, and whether the child had regular sleep routines. Nighttime sleep duration was  
127 operationalized as the period between reported bedtime and morning wake time.

#### 128 *Probable ADHD diagnosis at 10 years old*

129 Probable ADHD diagnosis at 10 years old was assessed via maternal ratings, using the well-validated  
130 Development and Well-Being Assessment interview (DAWBA) (27). Further details of the DAWBA  
131 are provided in Supplementary material. Considering that most cases with ADHD are diagnosed when  
132 children are 6 to 11 years old (28), we focused on ADHD at 10 years old to make sure that the majority  
133 of the potential cases with ADHD would be characterized. The DAWBA was administered via  
134 computer, generating the following 'probability bands' (i.e. levels of prediction of the probability of  
135 disorder for a DSM-IV diagnosis of ADHD, ranging from 0–very unlikely to 5–probable): 0:<0.1%  
136 probability of children in this band having the disorder; 1:~0.5%; 2:~3%; 3:~15%; 4:~50%; 5:>70%,  
137 respectively. The top two levels of the DAWBA bands were used as computer-generated DAWBA  
138 diagnoses, which was the measure selected for this study. This follows previous studies using the  
139 DAWBA bands, which were validated in 7,912 British children (7-19 years) and 1,364 Norwegian  
140 children (11-13 years), using clinician-rated DAWBA diagnoses as a gold standard (29). Briefly, the  
141 prevalence estimates of the computer-generated DAWBA diagnoses were of roughly comparable  
142 magnitude to the prevalence estimates from the clinician-generated diagnoses, but the estimates were  
143 not always very close. In contrast, the estimated effect sizes, significance levels and substantive  
144 conclusions regarding risk factor associations were very similar or identical. Therefore, the computer-  
145 generated DAWBA diagnoses may provide a useful alternative to clinician-rated diagnoses, when  
146 studying associations with risk factors, generating rough prevalence estimates or implementing

147 routine mental health screening. Therefore, here we use the term “probable ADHD diagnosis”, instead  
148 of ADHD diagnosis.

#### 149 *Inflammatory markers at 9 years old*

150 Blood samples were collected from non-fasting participants during clinic assessment at 9 years at  
151 around the same time of the day for each participant. Samples were immediately spun, frozen and  
152 stored at  $-80^{\circ}\text{C}$ . There was no evidence of freeze-thaw cycles during storage. High-sensitivity CRP  
153 (hsCRP) was measured at one time point at the same laboratory by automated particle-enhanced  
154 immunoturbidimetric assay (Roche UK, Welwyn Garden City, UK). Additionally, IL-6 was  
155 measured by single enzyme-linked immunosorbent assay (R&D Systems). All assay coefficients of  
156 variation were  $<5\%$ . Data on IL-6 and CRP were available for 5071 and 5081 participants,  
157 respectively. In the total sample, CRP values ranged from 0.01 to 67.74 mg/L. Fifty-nine subjects had  
158 CRP levels  $>10$  mg/L and were excluded from analysis due to the risk of confounding by acute  
159 inflammatory state (e.g. infection). IL-6 values ranged from 0.01 to 20.05 pg/ml and all values were  
160 kept for the analyses. Higher levels of IL-6 (18) and CRP (30) are both associated with higher  
161 probability of infection. IL-6 and CRP levels were log-transformed and standardized (Z-transformed),  
162 following previous research in the topic (31).

#### 163 *Confounders*

164 Multiple family risk factors were assessed using the Family Adversity Index (FAI) during pregnancy,  
165 at 2 years, and at 4 years. The FAI comprises 18 items on early parenthood, housing conditions,  
166 maternal education, financial difficulties, parents’ relationship, family size, family major problems,  
167 maternal psychopathology, parents’ substance abuse, crime records, partner support and social  
168 network. Points were summed at each time point for a total FAI score across the 3 time points. The  
169 FAI total score has a range of 0–18, with higher scores indicating higher number of family adversities  
170 across early childhood. We included this variable as confounder, as adverse family environment is  
171 associated with ADHD (32).



172 Other socio-economic factors selected as covariates were child's sex, preterm delivery,  
173 ethnicity (white vs non-white), maternal age when baby was born, and maternal socioeconomic status,  
174 which was measured using the Cambridge Social Interaction and Stratification Scale, which provides  
175 a total score (33). All these variables were selected as relevant confounders as there is a higher  
176 prevalence of ADHD in males (34), preterm children (35), white children (36), children with young  
177 mothers (37), and low socio-economic status (38).

## 178 **Statistical Analysis**

179 As 50.3% of the original sample was lost to attrition by the 10-year follow-up, we conducted logistic  
180 regressions to identify significant predictors of attrition. Children lost due to attrition were more  
181 frequently born preterm, had lower birth weight, had shorter gestational age, had younger mothers,  
182 had higher scores in family adversity, and were more often of non-white ethnicity (see supplementary  
183 table S1). Using the variables associated with selective dropout as the predictors, we fitted a logistic  
184 regression model (nonresponse vs response outcome) to determine weights for each individual using  
185 the inverse probability of response. The regression coefficients from this model were used to  
186 determine probability weights for the covariates in the main analyses.

187 A multi-staged analysis plan was developed. We first ran weighted logistic regression  
188 analyses in SPSS-v27, to ascertain the unadjusted and adjusted associations between sleep variables  
189 at 3.5 years and computer-generated DAWBA diagnoses of ADHD at 10 years. In Model A, we tested  
190 unadjusted associations. In Model B, we controlled for sex, maternal age at birth, FAI, ethnicity,  
191 preterm delivery and maternal socio-economic group. Further, the four sleep variables were evaluated  
192 together in the same model, to account for the potential overlap between sleep patterns in childhood.  
193 Because this study involves exploratory analysis of multiple separate hypotheses, as opposed to  
194 repeated analyses of a single hypothesis, we did not adjust for multiple testing (39).

195 To examine the potential mediating role of inflammation at 9 years, mediation models were  
196 tested using path analysis in SPSS-Amos v27, with maximum likelihood estimation to test the effect



197 of childhood sleep variables at 3.5 years on computer-generated DAWBA diagnoses of ADHD at 10  
198 years, with inflammatory markers at 9 years as mediating variables. We also controlled for the  
199 potential interaction of the explanatory variables (i.e., sleep variables). IL-6 and CRP were tested  
200 separately in independent mediation models. We included as explanatory variables only those sleep  
201 variables with significant associations in Model B, from the regression analyses. We also controlled  
202 for sex, FAI and preterm delivery, as these were the significant covariates from the regression  
203 analyses. We used bootstrapped bias-corrected confidence intervals and p values for assessing the  
204 significance of the standardized direct, indirect and total effects. Missing data was dealt with using  
205 the full information maximum likelihood method.

## 206 **Results**

207 Data were available on 7,769 participants whose mothers reported on ADHD information at 10 years.  
208 Table 1 shows the frequencies and descriptive values of sociodemographic, sleep and clinical  
209 variables. Further, a description of these variables in children with probable ADHD diagnosis,  
210 compared to non-ADHD are presented in Table 2.

211 The associations from the logistic regressions between sleep variables at 3.5 years and  
212 computer-generated DAWBA diagnoses of ADHD at 10 years appear on Table 3. In Model A, the  
213 four sleep variables at 3.5 years old were significantly associated with probable ADHD diagnosis at  
214 10 years. Furthermore, in Model B, when we controlled for the covariates, children with less regular  
215 sleep routines had higher odds of probable ADHD diagnosis at 10 years (OR=0.51, 95% CI=0.28-  
216 0.93, p=0.029), children with shorter nighttime sleep duration had higher odds of probable ADHD  
217 diagnosis (OR=0.70, 95% CI=0.56-0.89, p=0.004), and children with higher night awakening  
218 frequency had higher odds of probable ADHD diagnosis (OR=1.27, 95% CI=1.06-1.52, p=0.009) .

219 In relation to IL-6 at 9 years as potential mediator of the association between early childhood  
220 sleep variables and computer-generated DAWBA diagnoses of ADHD at 10 years, model fit indexes

221 indicated excellent model fit ( $\chi^2=0.27$ ,  $P=.60$ ; RMSEA=0; CFI=1.00). Consistent with the adjusted  
222 logistic regression, higher night awakening frequency at 3.5 years was directly and significantly  
223 associated with probable ADHD diagnosis at 10 years ( $\beta=0.035$ ,  $p<0.001$ ). Direct associations are  
224 shown in Figure 1. Further, we observed an indirect effect of IL-6 at 9 years in the association between  
225 irregular sleep routines at 3.5 years and probable ADHD diagnosis at 10 years (bias-corrected  
226 estimate, -0.002; 95% CI=-0.003 to -0.001,  $p=0.005$ ); and between higher night awakening frequency  
227 at 3.5 years and probable ADHD diagnosis at 10 years (bias-corrected estimate, 0.002; 95% CI=0.001  
228 to 0.003,  $p=0.003$ ) (see Table S2 in Supplement, for the indirect effects).

229 Concerning the potential mediating role of CRP at 9 years, we also demonstrated a good model  
230 fit ( $\chi^2=2.22$ ,  $P=.14$ ; RMSEA=0.009; CFI=1.00). Higher night awakening frequency at 3.5 years was  
231 the only early sleep problem which was directly and significantly associated with probable ADHD  
232 diagnosis at 10 years ( $\beta=0.036$ ,  $p<0.001$ ). Direct associations are shown in Figure 2. However, CRP  
233 at 9 years did not mediate any of the associations between early childhood sleep problems and  
234 probable ADHD diagnosis at 10 years (see Table S2 in Supplement, for the indirect effects).

## 235 **Discussion**

236 In a prospective well-established UK cohort study, we investigated whether several sleep variables at  
237 3.5 years old were associated with the probable diagnosis of ADHD at 10 years old. To our  
238 knowledge, this is the first longitudinal study to examine whether inflammation mediates the  
239 association between early childhood sleep problems and subsequent probable ADHD diagnosis. First,  
240 we found that irregular sleep routines, shorter nighttime sleep duration and higher night awakening  
241 frequency at 3.5 years were all associated with probable ADHD diagnosis at 10 years. Second, we  
242 found that IL-6 at 9 years mediated the associations of both irregular sleep routines and higher  
243 frequency of night awakening at 3.5 years with ADHD at 10 years. In contrast, CRP at 9 years did

244 not mediate any of the associations between early childhood sleep problems and probable ADHD  
245 diagnosis at 10 years.

246 We found that several parent-reported sleep problems in early childhood were prospectively  
247 associated with probable ADHD diagnosis at 10 years. This is consistent with previous research  
248 supporting the notion that sleep problems in early childhood might constitute an important risk factor  
249 for developing ADHD later in childhood. For instance, parent-reported short sleep duration at 5-6  
250 years old is prospectively associated with ADHD symptoms at 8-9 years old (40). Furthermore, these  
251 prospective associations with short sleep duration have been also reported at earlier ages, with shorter  
252 sleep duration from 3-to-24 months being associated with inattention at 5 years (12). These  
253 prospective associations continue into adolescence, with recent evidence suggesting that several sleep  
254 problems in early childhood, including insomnia, restless leg syndrome and frequent snoring (41), as  
255 well as difficulty going to sleep, nightmares and restless sleep predict ADHD symptoms in  
256 adolescence (42). Our findings contribute to the existing evidence by highlighting that specific sleep  
257 problems, including short sleep length and sleep fragmentation in early childhood are also related to  
258 probable ADHD diagnosis at 10 years old. Further, irregular sleep routines at 3.5 years were also  
259 prospectively related to probable ADHD diagnosis at 10 years, suggesting that a lack of routine is  
260 also an important factor to consider with regards to ADHD, as has been previously reported (43).

261 Several underlying mechanisms have been suggested to account for the link between sleep  
262 and ADHD. For example, sleep deprivation can impact the prefrontal cortex (44), and weaker  
263 function and structure of prefrontal cortex circuits associate with ADHD (45). Further, dopaminergic  
264 activity is associated with ADHD symptomology (46), and is also implicated in the regulation of  
265 sleep and waking (47). In this study, we focused on the two most commonly assayed inflammatory  
266 markers (i.e. IL-6 and CRP) as potential mediators of the prospective associations between sleep and  
267 ADHD in childhood, due to a possible role of inflammation in ADHD pathogenesis (48).

268 Our initial hypothesis that both markers of inflammation would mediate this association was  
269 partially supported. We found that IL-6, but not CRP, at 9 years, mediated the associations between  
270 two of the sleep variables tested at 3.5 years (i.e., irregular sleep routines and frequent night  
271 awakening) with ADHD at 10 years. The impacts of IL-6 and CRP on subsequent outcomes, including  
272 mental health and brain development may differ. For instance, in a longitudinal study, higher levels  
273 of IL-6 in childhood, but not CRP, were associated with an increased risk of developing depression  
274 and psychosis in young adulthood (49). Similarly, IL-6 at 9 years, but not CRP, was prospectively  
275 associated with diurnal mood variation, concentration difficulties, fatigue and sleep disturbances at  
276 18 years old (50), and with increased risk of hypomanic symptoms by age 22 years (51). A recent  
277 study also reported that genetically predicted IL-6, but not CRP, was significantly associated with  
278 gray matter volume (especially in the middle temporal gyrus and fusiform gyrus), and with cortical  
279 thickness (mainly in the superior frontal gyrus) (52), which are areas implicated in ADHD.

280 So far, it is still unknown why IL-6 but not CRP might play a greater role in the development  
281 of subsequent mental health problems. One potential explanation might be found in the different  
282 physiological actions associated with each of these inflammatory markers (53). However, it is still  
283 unknown how this might lead to different adverse outcomes and under which circumstances.  
284 Therefore, further research to understand and compare the potential distinct role of IL-6 and CRP in  
285 the development of mental disorders is needed.

286 This study has several strengths, including the large population-based sample size, the  
287 longitudinal design, and the inclusion of several sleep variables in early childhood. There are also  
288 some limitations. First, other potential contributing factors, such as depression, cognition, social  
289 interactions, obstetric complications, viral infections, smoking or body mass index were left  
290 unexplored. Second, DAWBA probable ADHD at 10 years was only reported by parents, and thus  
291 parental perceptions and/or assumptions could be constituting a bias of these assessments. Future  
292 studies should consider self-reported and/or teacher-reported assessments, in addition to clinical

293 interviews. Similarly, sleep was reported by the parents, and thus future studies should focus on  
294 objective measures of sleep. Third, the time-points included in this study were partially determined  
295 by the availability of the data collected in the ALSPAC. Future studies should also consider other  
296 developmental stages to investigate this topic. Fourth, as might be expected in a long-term population  
297 cohort study, the attrition rate was significant. However, we used procedures to ensure  
298 representativeness of our results. Finally, the prevalence of children with probable ADHD diagnosis  
299 using the top two levels of the DABWA-bands as computer-generated DAWBA diagnoses in this  
300 study was considerably smaller (i.e., 1.6%) than the prevalence reported by previous studies (e.g.,  
301 around 5%). These discrepancies in the prevalence might be related to the different methodology used  
302 to assess ADHD and the specific time points investigated. However, the lower prevalence detected  
303 using the DAWBA in our study supports the assumption that the DAWBA represents clinically  
304 relevant ADHD cases, and that only includes those children with probable ADHD diagnosis.

## 305 **Conclusions**

306 Our findings showed that several sleep variables in early childhood, including shorter nighttime sleep  
307 duration, higher night awakening and more irregular sleep routines at 3.5 years were associated with  
308 probable ADHD diagnosis at 10 years. Further, IL-6 at 9 years, but not CRP at 9 years mediated the  
309 associations between early sleep problems (i.e., higher night awakening and more irregular sleep  
310 routines) and probable ADHD diagnosis at 10 years. These findings support the relevant role of sleep  
311 problems at early stages of life as a risk factor for developing ADHD. In addition, a non-resolving  
312 pro-inflammatory mechanism might be a contributory pathway explaining why sleep problems in  
313 early childhood are linked to subsequent ADHD, and thus provides further support to the role of  
314 inflammation in mechanistic pathways to neurodevelopmental disorders, including ADHD. These  
315 results highlight the potential of future preventative interventions in ADHD, with the novel target of  
316 sleep and inflammation.

317 **Contributors:** IMM, SM, RU, AG and KL, designed the study. IMM was primarily responsible for  
318 data analysis and writing of the article. SM, RU, SK, AG and KL, reviewed and contributed critically  
319 to the writing of the article. All authors reviewed and contributed to the manuscript and approved the  
320 final version of the manuscript.

### 321 **Declaration of interests**

322 We declare no competing interests.

### 323 **Acknowledgments**

324 The UK Medical Research Council and Wellcome (Grant ref: 217065/Z/19/Z) and the University of  
325 Bristol provide core support for ALSPAC. We are extremely grateful to all the families who took part  
326 in this study, the midwives for their help in recruiting them, and the whole ALSPAC team, which  
327 includes interviewers, computer and laboratory technicians, clerical workers, research scientists,  
328 volunteers and managers.

### 329 **References**

- 330 1. Mindell JA, Owens J, Alves R, Bruni O, Goh DYT, Hiscock H, et al. Give children and  
331 adolescents the gift of a good night's sleep: a call to action. Vol. 12, Sleep medicine.  
332 Netherlands; 2011. p. 203–4.
- 333 2. Virring A, Lambek R, Thomsen PH, Moller LR, Jennum PJ. Disturbed sleep in attention-  
334 deficit hyperactivity disorder (ADHD) is not a question of psychiatric comorbidity or ADHD  
335 presentation. *J Sleep Res.* 2016 Jun;25(3):333–40.
- 336 3. Spruyt K, Aitken RJ, So K, Charlton M, Adamson TM, Horne RSC. Relationship between  
337 sleep/wake patterns, temperament and overall development in term infants over the first year  
338 of life. *Early Hum Dev.* 2008 May;84(5):289–96.
- 339 4. Sayal K, Prasad V, Daley D, Ford T, Coghill D. ADHD in children and young people:

- 340 prevalence, care pathways, and service provision. *The Lancet Psychiatry*. 2018 Feb;5(2):175–  
341 86.
- 342 5. American Psychiatric Association. *Diagnostic and Statistical Manual of Mental Disorders*.  
343 5th ed. American Psychiatric Association; 2013.
- 344 6. Banerjee T Das, Middleton F, Faraone S V. Environmental risk factors for attention-deficit  
345 hyperactivity disorder. *Acta Paediatr*. 2007 Sep;96(9):1269–74.
- 346 7. Faraone S V, Perlis RH, Doyle AE, Smoller JW, Goralnick JJ, Holmgren MA, et al.  
347 Molecular genetics of attention-deficit/hyperactivity disorder. *Biol Psychiatry*. 2005  
348 Jun;57(11):1313–23.
- 349 8. Weiss MD, Craig SG, Davies G, Schibuk L, Stein M. New Research on the Complex  
350 Interaction of Sleep and ADHD. *Curr Sleep Med Reports [Internet]*. 2015;1(2):114–21.  
351 Available from: <https://doi.org/10.1007/s40675-015-0018-8>
- 352 9. Yürümez E, Kılıç BG. Relationship Between Sleep Problems and Quality of Life in Children  
353 With ADHD. *J Atten Disord [Internet]*. 2013 Mar 19;20(1):34–40. Available from:  
354 <https://doi.org/10.1177/1087054713479666>
- 355 10. Gregory AM, O'Connor TG. Sleep problems in childhood: a longitudinal study of  
356 developmental change and association with behavioral problems. *J Am Acad Child Adolesc*  
357 *Psychiatry*. 2002 Aug;41(8):964–71.
- 358 11. O'Callaghan F V, Al Mamun A, O'Callaghan M, Clavarino A, Williams GM, Bor W, et al.  
359 The link between sleep problems in infancy and early childhood and attention problems at 5  
360 and 14 years: Evidence from a birth cohort study. *Early Hum Dev*. 2010 Jul;86(7):419–24.
- 361 12. Huhdanpää H, Morales-Muñoz I, Aronen ET, Pölkki P, Saarenpää-Heikkilä O, Paunio T, et  
362 al. Sleep Difficulties in Infancy Are Associated with Symptoms of Inattention and  
363 Hyperactivity at the Age of 5 Years: A Longitudinal Study. *J Dev Behav Pediatr*.



- 364 2019;40(6):432–40.
- 365 13. Cortese S, Faraone S V, Konofal E, Lecendreux M. Sleep in children with attention-  
366 deficit/hyperactivity disorder: meta-analysis of subjective and objective studies. *J Am Acad*  
367 *Child Adolesc Psychiatry*. 2009 Sep;48(9):894–908.
- 368 14. Gregory AM, Sadeh A. Sleep, emotional and behavioral difficulties in children and  
369 adolescents. *Sleep Med Rev*. 2012 Apr;16(2):129–36.
- 370 15. Wajszilber D, Santiseban JA, Gruber R. Sleep disorders in patients with ADHD: impact and  
371 management challenges. *Nat Sci Sleep*. 2018;10:453–80.
- 372 16. Wynchank D, Bijlenga D, Kooij JJS. Inflammation, Sleep and ADHD. Vol. 14, *Journal of*  
373 *clinical sleep medicine : JCSM : official publication of the American Academy of Sleep*  
374 *Medicine*. 2018. p. 1083.
- 375 17. Irwin MR, Olmstead R, Carroll JE. Sleep Disturbance, Sleep Duration, and Inflammation: A  
376 Systematic Review and Meta-Analysis of Cohort Studies and Experimental Sleep  
377 Deprivation. *Biol Psychiatry*. 2016 Jul;80(1):40–52.
- 378 18. Tanaka T, Narazaki M, Kishimoto T. IL-6 in inflammation, immunity, and disease. *Cold*  
379 *Spring Harb Perspect Biol*. 2014 Sep;6(10):a016295.
- 380 19. Nehring SM, Goyal A, Patel BC. C Reactive Protein. In *Treasure Island (FL)*; 2022.
- 381 20. LaVoy EC, Palmer CA, So C, Alfano CA. Bidirectional relationships between sleep and  
382 biomarkers of stress and immunity in youth. *Int J Psychophysiol Off J Int Organ*  
383 *Psychophysiol*. 2020 Dec;158:331–9.
- 384 21. Chang JP-C, Mondelli V, Satyanarayanan SK, Chiang Y-J, Chen H-T, Su K-P, et al.  
385 Cortisol, inflammatory biomarkers and neurotrophins in children and adolescents with  
386 attention deficit hyperactivity disorder (ADHD) in Taiwan. *Brain Behav Immun*. 2020

- 387 Aug;88:105–13.
- 388 22. Darwish AH, Elgohary TM, Nosair NA. Serum Interleukin-6 Level in Children With  
389 Attention-Deficit Hyperactivity Disorder (ADHD). *J Child Neurol*. 2019 Feb;34(2):61–7.
- 390 23. Boyd A, Golding J, Macleod J, Lawlor DA, Fraser A, Henderson J, et al. Cohort Profile: the  
391 'children of the 90s'--the index offspring of the Avon Longitudinal Study of Parents and  
392 Children. *Int J Epidemiol*. 2013 Feb;42(1):111–27.
- 393 24. Fraser A, Macdonald-Wallis C, Tilling K, Boyd A, Golding J, Davey Smith G, et al. Cohort  
394 Profile: the Avon Longitudinal Study of Parents and Children: ALSPAC mothers cohort. *Int  
395 J Epidemiol*. 2013 Feb;42(1):97–110.
- 396 25. Morales-Muñoz I, Broome MR, Marwaha S. Association of Parent-Reported Sleep Problems  
397 in Early Childhood With Psychotic and Borderline Personality Disorder Symptoms in  
398 Adolescence. *JAMA psychiatry*. 2020 Jul;
- 399 26. Paavonen J, Saarenpää-Heikkilä O, MoralesMunoz I, Virta M, Häkälä N, Pölkki P, et al.  
400 Normal sleep development in infants: findings from two large birth cohorts. *Sleep Med*.  
401 2020;69:145–54.
- 402 27. Goodman R, Ford T, Richards H, Gatward R, Meltzer H. The Development and Well-Being  
403 Assessment: description and initial validation of an integrated assessment of child and  
404 adolescent psychopathology. *J Child Psychol Psychiatry*. 2000 Jul;41(5):645–55.
- 405 28. Wilens TE, Spencer TJ. Understanding attention-deficit/hyperactivity disorder from  
406 childhood to adulthood. *Postgrad Med*. 2010 Sep;122(5):97–109.
- 407 29. Goodman A, Heiervang E, Collishaw S, Goodman R. The “DAWBA bands” as an ordered-  
408 categorical measure of child mental health: description and validation in British and  
409 Norwegian samples. *Soc Psychiatry Psychiatr Epidemiol*. 2011 Jun;46(6):521–32.

- 410 30. Landry A, Docherty P, Ouellette S, Cartier LJ. Causes and outcomes of markedly elevated C-  
411 reactive protein levels. *Can Fam Physician*. 2017 Jun;63(6):e316–23.
- 412 31. Perry BI, Zammit S, Jones PB, Khandaker GM. Childhood inflammatory markers and risks  
413 for psychosis and depression at age 24: Examination of temporality and specificity of  
414 association in a population-based prospective birth cohort. *Schizophr Res*. 2021 Mar;230:69–  
415 76.
- 416 32. Thapar A, Cooper M, Jefferies R, Stergiakouli E. What causes attention deficit hyperactivity  
417 disorder? *Arch Dis Child [Internet]*. 2012 Mar 1;97(3):260 LP – 265. Available from:  
418 <http://adc.bmj.com/content/97/3/260.abstract>
- 419 33. Prandy K, Lambert P. Marriage, Social Distance and the Social Space:: An Alternative  
420 Derivation and Validation of the Cambridge Scale. *Sociology [Internet]*. 2003 Aug  
421 1;37(3):397–411. Available from: <https://doi.org/10.1177/00380385030373001>
- 422 34. Rucklidge JJ. Gender differences in attention-deficit/hyperactivity disorder. *Psychiatr Clin*  
423 *North Am*. 2010 Jun;33(2):357–73.
- 424 35. Montagna A, Karolis V, Batalle D, Counsell S, Rutherford M, Arulkumaran S, et al. ADHD  
425 symptoms and their neurodevelopmental correlates in children born very preterm. *PLoS One*.  
426 2020;15(3):e0224343.
- 427 36. Shi Y, Hunter Guevara LR, Dykhoff HJ, Sangaralingham LR, Phelan S, Zaccariello MJ, et  
428 al. Racial Disparities in Diagnosis of Attention-Deficit/Hyperactivity Disorder in a US  
429 National Birth Cohort. *JAMA Netw Open [Internet]*. 2021;4(3):e210321–e210321. Available  
430 from: <https://doi.org/10.1001/jamanetworkopen.2021.0321>
- 431 37. Chang Z, Lichtenstein P, D’Onofrio BM, Almqvist C, Kuja-Halkola R, Sjölander A, et al.  
432 Maternal age at childbirth and risk for ADHD in offspring: a population-based cohort study.  
433 *Int J Epidemiol*. 2014 Dec;43(6):1815–24.

- 434 38. Russell AE, Ford T, Williams R, Russell G. The Association Between Socioeconomic  
435 Disadvantage and Attention Deficit/Hyperactivity Disorder (ADHD): A Systematic Review.  
436 Child Psychiatry Hum Dev. 2016 Jun;47(3):440–58.
- 437 39. Streiner DL. Best (but oft-forgotten) practices: the multiple problems of multiplicity-whether  
438 and how to correct for many statistical tests. Am J Clin Nutr. 2015 Oct;102(4):721–8.
- 439 40. Tso W, Chan M, Ho FK, Rao N, Li AM, Chan KL, et al. Early sleep deprivation and  
440 attention-deficit/hyperactivity disorder. Pediatr Res. 2019 Mar;85(4):449–55.
- 441 41. Liu B-P, Wang X-T, Liu Z-Z, Wang Z-Y, An D, Wei Y-X, et al. Depressive symptoms are  
442 associated with short and long sleep duration: A longitudinal study of Chinese adolescents. J  
443 Affect Disord. 2020 Feb;263:267–73.
- 444 42. Carpena MX, Munhoz TN, Xavier MO, Rohde LA, Santos IS, Del-Ponte B, et al. The Role  
445 of Sleep Duration and Sleep Problems During Childhood in the Development of ADHD in  
446 Adolescence: Findings From a Population-Based Birth Cohort. J Atten Disord. 2020  
447 Feb;24(4):590–600.
- 448 43. Weiss MD, Wasdell MB, Bomben MM, Rea KJ, Freeman RD. Sleep hygiene and melatonin  
449 treatment for children and adolescents with ADHD and initial insomnia. J Am Acad Child  
450 Adolesc Psychiatry. 2006 May;45(5):512–9.
- 451 44. Owens J, Gruber R, Brown T, Corkum P, Cortese S, O'Brien L, et al. Future research  
452 directions in sleep and ADHD: report of a consensus working group. J Atten Disord. 2013  
453 Oct;17(7):550–64.
- 454 45. Arnsten AFT. The Emerging Neurobiology of Attention Deficit Hyperactivity Disorder: The  
455 Key Role of the Prefrontal Association Cortex. J Pediatr. 2009 May;154(5):I-S43.
- 456 46. Solanto M V. Dopamine dysfunction in AD/HD: integrating clinical and basic neuroscience  
457 research. Behav Brain Res. 2002 Mar;130(1–2):65–71.

- 458 47. Monti JM, Monti D. The involvement of dopamine in the modulation of sleep and waking.  
459 Sleep Med Rev. 2007 Apr;11(2):113–33.
- 460 48. Anand D, Colpo GD, Zeni G, Zeni CP, Teixeira AL. Attention-Deficit/Hyperactivity  
461 Disorder And Inflammation: What Does Current Knowledge Tell Us? A Systematic Review.  
462 Front psychiatry. 2017;8:228.
- 463 49. Khandaker GM, Pearson RM, Zammit S, Lewis G, Jones PB. Association of serum  
464 interleukin 6 and C-reactive protein in childhood with depression and psychosis in young  
465 adult life: a population-based longitudinal study. JAMA psychiatry. 2014 Oct;71(10):1121–  
466 8.
- 467 50. Chu AL, Stochl J, Lewis G, Zammit S, Jones PB, Khandaker GM. Longitudinal association  
468 between inflammatory markers and specific symptoms of depression in a prospective birth  
469 cohort. Brain Behav Immun. 2019 Feb;76:74–81.
- 470 51. Hayes JF, Khandaker GM, Anderson J, Mackay D, Zammit S, Lewis G, et al. Childhood  
471 interleukin-6, C-reactive protein and atopic disorders as risk factors for hypomanic symptoms  
472 in young adulthood: a longitudinal birth cohort study. Psychol Med. 2016/08/01.  
473 2017;47(1):23–33.
- 474 52. Williams JA, Burgess S, Suckling J, Lalouis PA, Batool F, Griffiths SL, et al. Inflammation  
475 and Brain Structure in Schizophrenia and Other Neuropsychiatric Disorders: A Mendelian  
476 Randomization Study. JAMA Psychiatry [Internet]. 2022 Mar 30; Available from:  
477 <https://doi.org/10.1001/jamapsychiatry.2022.0407>
- 478 53. Del Giudice M, Gangestad SW. Rethinking IL-6 and CRP: Why they are more than  
479 inflammatory biomarkers, and why it matters. Brain Behav Immun. 2018 May;70:61–75.

480

481

482 **Table 1.** Descriptive variables of the sample at 10 years old

| <b>Socio-demographic factors</b>       | <b>Frequencies</b> |             | <b>Descriptives</b> |        |
|----------------------------------------|--------------------|-------------|---------------------|--------|
|                                        | N                  | %           | Mean                | SD     |
| Sex (boys / girls)                     | 3919 / 3850        | 50.4 / 49.6 | ---                 | ---    |
| Ethnicity (white / non-whites)         | 7077 / 121         | 98.3 / 1.7  | ---                 | ---    |
| Birth weight, grammes                  | ---                | ---         | 3420.01             | 542.77 |
| FAI, total score                       | ---                | ---         | 3.93                | 4.01   |
| Maternal age when birth                | ---                | ---         | 29.05               | 4.58   |
| Gestational age, weeks                 | ---                | ---         | 39.45               | 1.85   |
| Preterm delivery (Y/N)                 | 347 / 4169         | 7.7 / 92.3  | ---                 | ---    |
| Maternal socio-economic status         | ---                | ---         | 54.95               | 13.54  |
| <b>Sleep variables at 3.5 years</b>    | N                  | %           | Mean                | SD     |
| Regular sleep routines (Y/N)           | 6395 / 465         | 93.2 / 6.8  | ---                 | ---    |
| Daytime sleep duration, hours          | ---                | ---         | 0.35                | 0.70   |
| Nighttime sleep duration, hours        | ---                | ---         | 10.73               | 0.84   |
| Night awakenings per night, n          | ---                | ---         | 0.57                | 0.82   |
| <b>ADHD</b>                            | N                  | %           | Mean                | SD     |
| DAWBA probable ADHD diagnosis (Y/N)    | 128 / 7641         | 1.6 / 98.4  | ---                 | ---    |
| <b>Inflammatory markers at 9 years</b> | N                  | %           | Mean                | SD     |
| CRP mg/L                               | ---                | ---         | 0.55                | 0.21   |
| IL-6 pg/ml                             | ---                | ---         | 1.28                | 1.57   |

483 ADHD = Attention deficit and hyperactivity disorder; FAI=Family adversity index; DAWBA =  
 484 Development and Well-Being Assessment interview CRP=C-reactive protein; IL-6=Interleukin 6;  
 485 CRP values ranged from 0.01 to 10 mg/L; and IL-6 values ranged from 0.01 to 20.05 pg/ml

486

487

488

489

490

491

492

493

494

495

496

497

498

499 **Table 2.** Differences in socio-demographic and sleep variables between children with and without  
 500 probable ADHD diagnosis at 10 years

| Variables                        | Probable ADHD diagnosis at 10 years |               | p      |
|----------------------------------|-------------------------------------|---------------|--------|
|                                  | Yes (n = 128)                       | No (n = 7641) |        |
|                                  | N (%)                               | N (%)         |        |
| Sex                              |                                     |               | <0.001 |
| Male                             | 104 (2.7)                           | 3815 (97.3)   |        |
| Female                           | 24 (0.6)                            | 3826 (99.4)   |        |
| Preterm delivery                 |                                     |               | <0.001 |
| Yes                              | 15 (4.3)                            | 332 (95.7)    |        |
| No                               | 70 (1.7)                            | 4099 (98.3)   |        |
| Regular sleep routines 3.5 years |                                     |               | 0.004  |
| Yes                              | 96 (1.5)                            | 6299 (98.5)   |        |
| No                               | 15 (3.2)                            | 450 (96.8)    |        |
| Ethnicity                        |                                     |               | 0.951  |
| White                            | 112 (1.6)                           | 6965 (98.4)   |        |
| Other                            | 2 (1.7)                             | 119 (98.3)    |        |
|                                  | Mean (SD)                           | Mean (SD)     | p      |
| Maternal age when born (years)   | 28.41 (5.41)                        | 29.06 (4.57)  | 0.117  |
| Family Adversity score           | 7.19 (5.47)*                        | 3.87 (3.96)   | <0.001 |
| Gestational age (weeks)          | 39.02 (1.92)                        | 39.45 (1.85)  | 0.011  |
| Maternal socio-economic status   | 49.91 (13.27)                       | 55.03 (13.53) | <0.001 |
| Birth weight, kg                 | 3.31 (0.55)                         | 3.42 (0.54)   | 0.035  |
| Daytime sleep duration, hours    | 0.52 (0.87)                         | 0.35 (0.70)   | 0.010  |
| Nighttime sleep duration, hours  | 10.83 (1.18)                        | 10.73 (0.83)  | 0.187  |
| Night awakenings per night, n    | 0.84 (1.22)                         | 0.57 (0.81)   | 0.001  |
| CRP mg/L                         | 0.52 (0.86)*                        | 0.56 (1.02)   | 0.786  |
| IL-6                             | 1.36 (1.37)*                        | 1.28 (1.57)   | 0.707  |

501 CRP=C-reactive protein; IL-6=Interleukin 6

502 \*Children with probable ADHD diagnosis at 10 years old reported significant higher score in Family  
 503 Adversity Index (i.e. higher frequency of family adversities in early childhood) compared to children  
 504 with no diagnosis of ADHD. There were not statistically significant differences between ADHD and  
 505 non-ADHD children for CRP and IL-6 levels; however, children with probable ADHD diagnosis at  
 506 10 years presented slightly lower CRP levels at 9 years, while higher IL-6 levels at 9 years.

507

508

509

510

511

512

513

514



515 **Table 3.** Logistic regression analyses between sleep problems at 3.5 years and probable ADHD  
 516 diagnosis at 10 years

| Probable ADHD diagnosis at 10 years        |                            |                     |                 |                          |                     |                 |
|--------------------------------------------|----------------------------|---------------------|-----------------|--------------------------|---------------------|-----------------|
|                                            | Unadjusted model (Model A) |                     |                 | Adjusted model (Model B) |                     |                 |
|                                            | OR                         | CI 95%              | p               | OR                       | CI 95%              | p               |
| Regular sleep routines, 3.5 years          | <b>.35</b>                 | <b>.20 to .63</b>   | <b>&lt;.001</b> | <b>.51</b>               | <b>.28 to .93</b>   | <b>.029</b>     |
| Daytime sleep duration, hours, 3.5 years   | <b>1.38</b>                | <b>1.08 to 1.76</b> | <b>.009</b>     | 1.24                     | .97 to 1.58         | .088            |
| Nighttime sleep duration, hours, 3.5 years | <b>.73</b>                 | <b>.57 to .92</b>   | <b>.007</b>     | <b>.70</b>               | <b>.56 to .89</b>   | <b>.004</b>     |
| Night awakenings per night, 3.5 years      | <b>1.29</b>                | <b>1.09 to 1.53</b> | <b>.003</b>     | <b>1.27</b>              | <b>1.06 to 1.52</b> | <b>.009</b>     |
| Sex                                        | ---                        | ---                 | ---             | <b>.29</b>               | <b>.18 to .47</b>   | <b>&lt;.001</b> |
| Maternal age birth                         | ---                        | ---                 | ---             | 1.01                     | .97 to 1.05         | .712            |
| FAI                                        | ---                        | ---                 | ---             | <b>1.12</b>              | <b>1.08 to 1.16</b> | <b>&lt;.001</b> |
| Ethnicity                                  | ---                        | ---                 | ---             | 1.32                     | .43 to 4.06         | .630            |
| Preterm                                    | ---                        | ---                 | ---             | <b>.30</b>               | <b>.18 to .50</b>   | <b>&lt;.001</b> |
| Socio-economic group                       | ---                        | ---                 | ---             | 1.02                     | .94 to 1.12         | .584            |

517 OR=Odd ratio; CI=Confidence interval.

518 Ethnicity=white vs non-white.

519 FAI=Family adversity index; it comprises 18 items (i.e., long index) on early parenthood, housing  
 520 conditions, maternal education, financial difficulties, parents' relationship, family size, family major  
 521 problems, maternal psychopathology, parents' substance abuse, crime records, partner support and  
 522 social network. The FAI was assessed during pregnancy (long index), at 2 years (long index), and at  
 523 4 years (short index). The short index excludes social, practical, and financial support. Points were  
 524 summed at each time point for a total FAI score across the 3 time points.

525 Maternal socioeconomic status was measured using the Cambridge Social Interaction and  
 526 Stratification Scale, which provides a total score

527

528

529

530

531

532

533

534

535 **Figures**

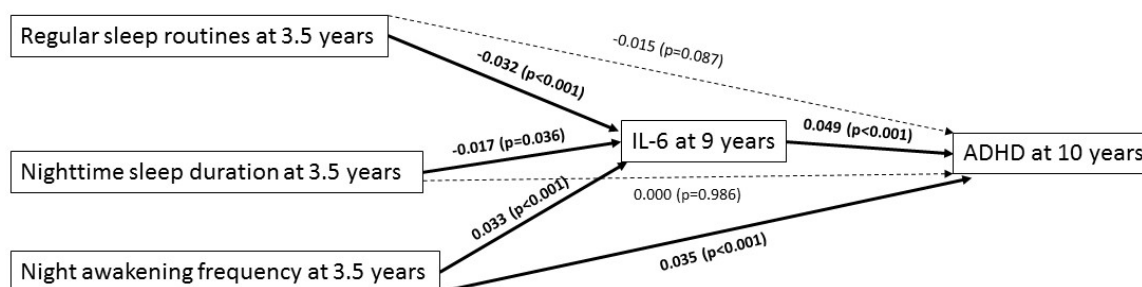

536

537 **Figure 1. Path diagram showing the main direct associations, with IL-6 at 9 years as mediating**  
538 **factor.** This figure shows only the direct associations of the independent, mediating and dependent  
539 variable. Sleep variables (i.e., regular sleep routines, nighttime sleep duration and night awakening  
540 frequency) at 3.5 years represent the independent variables; IL-6 at 9 years the mediating factor; and  
541 probable ADHD diagnosis at 10 years represents the outcome. The covariates also included in this  
542 path analyses were sex, family adversity and preterm delivery, due to the significant associations with  
543 the outcome found in the logistic regression model. Significant pathways are signified by solid arrows  
544 and nonsignificant pathways by dotted-dashed lines.

545

546

547

548

549

550

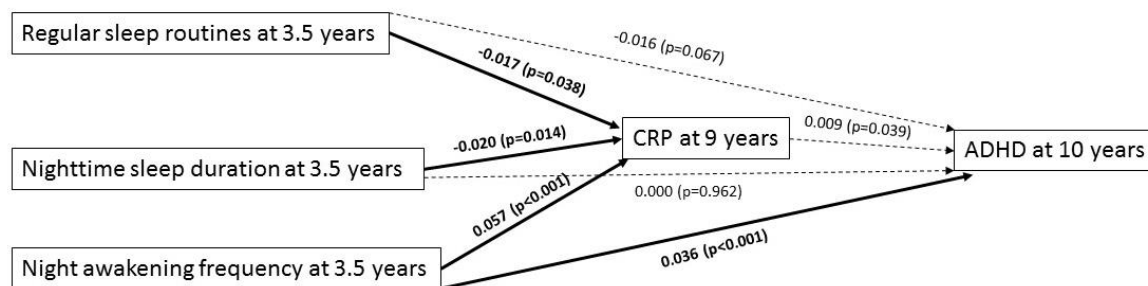

551

552 **Figure 2. Path diagram showing the main direct associations, with CRP at 9 years as mediating**  
553 **factor.** This figure shows only the direct associations of the independent, mediating and dependent  
554 variable. Sleep variables (i.e., regular sleep routines, nighttime sleep duration and night awakening  
555 frequency) at 3.5 years represent the independent variables; CRP at 9 years the mediating factor; and  
556 probable ADHD diagnosis at 10 years represents the outcome. The covariates also included in this  
557 path analyses were sex, family adversity and preterm delivery, due to the significant associations with  
558 the outcome found in the logistic regression model. Significant pathways are signified by solid arrows  
559 and nonsignificant pathways by dotted-dashed lines.

560

561

562

563

564

565

566

567

568

569

## 570 **Supplementary material**

### 571 **Further details of the ALSPAC cohort:**

572 The initial number of pregnancies enrolled was 14,541 (for these at least one questionnaire was  
573 returned, or a “Children in Focus” clinic had been attended by 19/07/99). Of these initial pregnancies,  
574 there was a total of 14676 foetuses, resulting in 14062 live births and 13988 children who were alive  
575 at 1 year of age. When the oldest children were approximately 7 years of age, an attempt was made  
576 to bolster the initial sample with eligible cases who had failed to join the study originally. As a result,  
577 in our study, as some variables were collected from the age of seven onwards there were data available  
578 for more than the 14541 pregnancies mentioned above. Informed consent for the use of data collected  
579 via questionnaires and clinics was obtained from participants following the recommendations of the  
580 ALSPAC Ethics and Law Committee at the time. Ethical approval was obtained from the ALSPAC  
581 Law and Ethics committee and the local research ethics committees.

582

583

584

585

586

587

588

589

590

591

592 **Further details of the Development and Well-Being Assessment (DAWBA):**

593 The DAWBA is a package of interviews, questionnaires and rating techniques designed to generate  
594 ICD-10 and DSM-IV or DSM-5 psychiatric diagnoses about 2-17 years old. The DAWBA includes  
595 a mix of ‘closed’/structured questions and open-ended questions, where respondents describe their  
596 difficulties in their own words. The full DAWBA package covers the following diagnoses: Separation  
597 anxiety, Specific phobia, Social phobia, Panic disorder/agoraphobia, Post-traumatic stress disorder,  
598 Obsessive compulsive disorder, Generalized anxiety disorder, Body dysmorphic disorder, Disruptive  
599 mood dysregulation disorder, Major depression, ADHD/hyperkinesis, Oppositional defiant disorder,  
600 Conduct disorder, Eating disorders, including anorexia, bulimia and binge eating, Autism spectrum  
601 disorders, Tic disorders, including Tourette syndrome, and Bipolar disorders. For each of these  
602 disorders, the interview asks about all the symptoms, and other criteria needed for an operationalized  
603 diagnosis according to both DSM-IV (American Psychiatric Association, 1994) and the research  
604 diagnostic version of ICD-10 (World Health Organisation, 1994). Panic disorder, agoraphobia,  
605 autistic disorders, eating disorders, tic disorders, and any other concerns are covered more briefly,  
606 with clinical diagnoses of these disorders being correspondingly more dependent on rating the open-  
607 ended transcript. The time frame of the interview is the present and the recent past. For many  
608 disorders, the ICD-10 and DSM-IV diagnostic criteria stipulate that the symptoms need to have  
609 persisted for a specified number of months, e.g. a minimum of 6 months for hyperactivity,  
610 oppositional-defiant disorder, and generalized anxiety disorders. In these instances, the relevant  
611 section of the DAWBA interview focuses on the child’s symptoms over this  
612 stipulated period. The time frame is longest for conduct disorder (since DSM-IV criteria include the  
613 number of relevant behaviours displayed over the previous 12 months), and shortest for most of the  
614 emotional disorders, where the focus is on the last month, in line with previous recommendations  
615 (Shaffer et al., 1996).

616 **Table S2.** Differences in socio-demographic variables between non-participating and participating subjects in the study at 10 years old  
 617

|                        | Non-participating group in the study |             | Participating group in the study |             | Non-participating versus participating |          |
|------------------------|--------------------------------------|-------------|----------------------------------|-------------|----------------------------------------|----------|
|                        | <i>Mean</i>                          | <i>SD</i>   | <i>Mean</i>                      | <i>SD</i>   | <i>OR (95% CI)</i>                     | <i>p</i> |
| Maternal age when born | 26.81                                | 5.11        | 29.05                            | 4.58        | 1.10 (1.09 to 1.11)                    | <0.001   |
| Gestational age        | 37.24                                | 7.46        | 39.45                            | 1.85        | 1.14 (1.10 to 1.13)                    | <0.001   |
| Birth weight, kg       | 3.34                                 | 0.62        | 3.42                             | 0.54        | 1.28 (1.21 to 1.35)                    | <0.001   |
| Family Adversity score | 5.34                                 | 4.75        | 3.93                             | 4.01        | 0.93 (0.92 to 0.94)                    | <0.001   |
|                        | Non-participating group in the study |             | Participating group in the study |             |                                        |          |
|                        | <i>N</i>                             | <i>%</i>    | <i>N</i>                         | <i>%</i>    |                                        |          |
| Sex                    |                                      |             |                                  |             | 0.94 (0.88 to 1.01)                    | 0.077    |
| Male / Female          | 3772 / 3498                          | 51.9 / 48.1 | 3919 / 3850                      | 50.4 / 49.6 |                                        |          |
| Ethnicity              |                                      |             |                                  |             | 0.42 (0.33 to 0.52)                    | <0.001   |
| White / Other          | 4985 / 205                           | 96.1 / 3.9  | 7077 / 1.7                       | 98.3 / 1.7  |                                        |          |
| Preterm delivery       |                                      |             |                                  |             | 0.56 (0.49 to 0.65)                    | <0.001   |
| Yes / No               | 509 / 3443                           | 12.9 / 87.1 | 347 / 4169                       | 7.7 / 92.3  |                                        |          |

618 The individuals associated with attrition at 10 years were more frequently born preterm, had lower weight at birth, had shorter gestational age,  
 619 had younger mothers at birth, had higher scores in family adversity, and were more often of non-white ethnicity.

620

621

622

623

624

625

626

627 **Table S2.** Bootstrapped bias-corrected confidence intervals and p values for the hypothesized indirect pathways to probable ADHD diagnosis at  
 628 10 years with IL6 at 9 years, and CRP at 9 years as mediators

|                                  | Probable ADHD diagnosis at 10 years<br>Via IL-6 at 9 years |               |              | Probable ADHD diagnosis at 10 years<br>Via CRP at 9 years |             |       |
|----------------------------------|------------------------------------------------------------|---------------|--------------|-----------------------------------------------------------|-------------|-------|
|                                  | Lower Bound                                                | Upper Bound   | p            | Lower Bound                                               | Upper Bound | p     |
|                                  | Nigh awakening frequency 3.5 years                         | <b>0.001</b>  | <b>0.003</b> | <b>0.003</b>                                              | -0.001      | 0.000 |
| Regular sleep routines 3.5 years | <b>-0.003</b>                                              | <b>-0.001</b> | <b>0.005</b> | -0.001                                                    | 0.000       | 0.268 |
| Night sleep duration 3.5 years   | -0.002                                                     | 0.000         | 0.093        | 0.000                                                     | 0.001       | 0.365 |

629 IL-6=Interleukin 6; CRP=C-reactive protein

630



631

632
